# Supplementary material
Source: publisher figshare collection journal article supplement (https://gsapubs.figshare.com/ndownloader/files/38206794)
Supplement: Supplementary file 1 [file 38206794]

## Sheet: meta-data paleocurrents
basin	unit	sed. episode	paleocurrent trend	n	lithofacies	depositional system	meas_type	latitude	longitude	source	notes
Central Colorado Trough	upper Sangre de Cristo Fm.	3	196	24	St	fluvial-alluvial	trough limbs	38.481	-105.84	this study	4SMST565
Paradox Basin	Cutler	3	339	20	St	fluvial-alluvial	trough limbs	38.0443	-107.681	this study	SJMT6
Paradox Basin	Cutler	3	258	25	St	fluvial-alluvial	trough limbs	37.3889	-107.852	this study	SJMT2019rv1
Paradox Basin	Cutler	3	348	10	Gci	fluvial-alluvial	imbricated clasts	37.192	-109.731	this study	1MHRCT76
Paradox Basin	Cutler	3	73	10	Gci	fluvial-alluvial	imbricated clasts	37.2168	-109.716	this study	1MHRCT217.5
Paradox Basin	Cutler	3	314	20	St	fluvial-alluvial	trough limbs	38.5074	-109.668	this study	1CORT209
Paradox Basin	Cutler	3	200	10	St	fluvial-alluvial	trough axes	36.3107	-106.339	this study	1CCT27
Paradox Basin	Cutler	3	148	10	Sp	eolian	planar foresets	38.4979	-109.683	this study	2CORT65
Paradox Basin	Cutler	3	269	5	St	fluvial-alluvial	trough axes	38.6905	-108.971	this study	1DCGT19
Paradox Basin	Cutler	3	244	20	St	fluvial-alluvial	tough limbs	38.7136	-109.261	this study	3FTCT142
Orogrande Basin	Abo	3	263	12	Gci	fluvial-alluvial	imbricated clasts	33.1319	-105.97	this study	1CCBAT289.5
Orogrande Basin	Holder	3	243	21	St	deltaic	trough limbs	32.9812	-105.93	this study	SMT1
Orogrande Basin	Abo	3	204	10	Gci	fluvial-alluvial	imbricated clasts	32.8338	-107.228	this study	2CMT83
Eagle Basin	Maroon Fm.	3	9	20	St	fluvial-alluvial	trough limbs	39.6693	-107.699	this study	2RFMMT179
Taos Trough	Sangre de Cristo Fm.	3	276	21	St	fluvial-alluvial	trough limbs	35.9488	-105.261	this study	1BDK833
Paradox Basin	Honaker Trail Fm.	3	240	20	St	fluvial-alluvial	trough limbs	38.5132	-109.034	this study	HT2-SB
Taos Trough	Yeso	4	263	10	Sp	eolian	planar cross-beds	35.9446	-105.255	this study	1BDK1432
Paradox Basin	Cutler	3	202	456	not included	fluvial-alluvial	not included	36.216	-106.591	Eberth & Miall, 1991	location interpolated from georeferenced map (fig. 16)
Paradox Basin	Cutler	3	197	799	not included	fluvial-alluvial	not included	36.164	-106.65	Eberth & Miall, 1991	location interpolated from georeferenced map (fig. 16)
Paradox Basin	Cutler	3	187	73	not included	fluvial-alluvial	not included	36.332	-106.316	Eberth & Miall, 1991	location interpolated from georeferenced map (fig. 16)
Paradox Basin	Cutler	3	195	195	not included	fluvial-alluvial	not included	36.292	-106.353	Eberth & Miall, 1991	location interpolated from georeferenced map (fig. 16)
Paradox Basin	Cutler	3	157	58	not included	fluvial-alluvial	not included	35.815	-106.651	Eberth & Miall, 1991	location interpolated from georeferenced map (fig. 16)
Paradox Basin	Cutler	3	210	130	not included	fluvial-alluvial	not included	35.722	-106.714	Eberth & Miall, 1991	location interpolated from georeferenced map (fig. 16)
Paradox Basin	Cutler	3	349	10	St	fluvial-alluvial	trough axes	38.662	-109.462	Lawton et al., 2015 and references therein	locationand azimuth interpolated from georeferenced map (Fig. 4)
Paradox Basin	Cutler	3	300	10	St	fluvial-alluvial	trough axes	38.669	-109.313	Lawton et al., 2015 and references therein	locationand azimuth interpolated from georeferenced map (Fig. 4)
Paradox Basin	Cutler	3	301	10	St	fluvial-alluvial	trough axes	38.698	-109.267	Lawton et al., 2015 and references therein	locationand azimuth interpolated from georeferenced map (Fig. 4)
Paradox Basin	Cutler	3	296	10	St	fluvial-alluvial	trough axes	38.722	-109.271	Lawton et al., 2015 and references therein	locationand azimuth interpolated from georeferenced map (Fig. 4)
Denver Basin	Upper Fountain	3	120	not included	not included	fluvial-alluvial	not included	38.838	-104.891	Sweet & Soreghan, 2010	locationand azimuth interpolated from georeferenced map (Fig. 2)
Denver Basin	Middle Fountain	3	43	not included	not included	fluvial-alluvial	not included	38.869	-104.895	Sweet & Soreghan, 2010	locationand azimuth interpolated from georeferenced map (Fig. 2)
Denver Basin	Lower Fountain	3	47	not included	not included	fluvial-alluvial	not included	38.866	-104.915	Sweet & Soreghan, 2010	locationand azimuth interpolated from georeferenced map (Fig. 2)
Taos Trough	Sangre de Cristo	3	163	99	not included	fluvial-alluvial	trough cross-beds	36.109	-105.223	Soegaard & Caldwell, 1990	location interpolated from georeferenced map (Fig. 1)
Taos Trough	Sangre de Cristo	3	183	10	not included	fluvial-alluvial	trough cross-beds	35.754	-105.286	Soegaard & Caldwell, 1990	location interpolated from georeferenced map (Fig. 1)
Taos Trough	Sangre de Cristo	3	186	43	not included	fluvial-alluvial	trough cross-beds	35.441	-105.356	Soegaard & Caldwell, 1990	location interpolated from georeferenced map (Fig. 1)
Taos Trough	Sangre de Cristo	3	179	50	not included	fluvial-alluvial	trough cross-beds	35.361	-105.421	Soegaard & Caldwell, 1990	location interpolated from georeferenced map (Fig. 1)
Taos Trough	Sangre de Cristo	3	187	29	not included	fluvial-alluvial	trough cross-beds	35.328	-105.467	Soegaard & Caldwell, 1990	location interpolated from georeferenced map (Fig. 1)
Taos Trough	Sangre de Cristo	3	146	21	not included	fluvial-alluvial	trough cross-beds	35.375	-105.491	Soegaard & Caldwell, 1990	location interpolated from georeferenced map (Fig. 1)
Taos Trough	Sangre de Cristo	3	167	37	not included	fluvial-alluvial	trough cross-beds	35.485	-105.67	Soegaard & Caldwell, 1990	location interpolated from georeferenced map (Fig. 1)
Eagle Basin	Maroon	3	229	33	not included	fluvial-alluvial	trough cross beds & scours	39.703	-106.388	Johnson, 1987	location interpolated from georeferenced map (Fig. 13)
Eagle Basin	Maroon	3	47	79	not included	fluvial-alluvial	trough cross beds & scours	39.701	-106.811	Johnson, 1987	location interpolated from georeferenced map (Fig. 13)
Eagle Basin	Maroon	3	41	47	not included	fluvial-alluvial	trough cross beds & scours	39.831	-106.976	Johnson, 1987	location interpolated from georeferenced map (Fig. 13)
Eagle Basin	Maroon	3	226	16	not included	fluvial-alluvial	trough cross beds & scours	39.951	-106.741	Johnson, 1987	location interpolated from georeferenced map (Fig. 13)
Eagle Basin	Maroon	3	71	36	not included	fluvial-alluvial	trough cross beds & scours	39.353	-107.043	Johnson, 1987	location interpolated from georeferenced map (Fig. 13)
Eagle Basin	Maroon	3	63	104	not included	fluvial-alluvial	trough cross beds & scours	39.535	-107.33	Johnson, 1987	location interpolated from georeferenced map (Fig. 13)
Eagle Basin	Maroon	3	18	73	not included	fluvial-alluvial	trough cross beds & scours	39.687	-107.716	Johnson, 1987	location interpolated from georeferenced map (Fig. 13)
Eagle Basin	Maroon	3	53	49	not included	fluvial-alluvial	trough cross beds & scours	39.648	-107.735	Johnson, 1987	location interpolated from georeferenced map (Fig. 13)
Eagle Basin	Maroon	3	14	10	not included	fluvial-alluvial	trough cross beds & scours	40.064	-107.372	Johnson, 1987	location interpolated from georeferenced map (Fig. 13)
Eagle Basin	Weber Sandstone	3	168	5	Sp	eolian	planar foresets	39.535	-107.33	Johnson, 1987	location interpolated from georeferenced map (Fig. 13)
Eagle Basin	Weber Sandstone	3	161	3	Sp	eolian	planar foresets	39.687	-107.716	Johnson, 1987	location interpolated from georeferenced map (Fig. 13)
Eagle Basin	Weber Sandstone	3	239	6	Sp	eolian	planar foresets	39.648	-107.735	Johnson, 1987	location interpolated from georeferenced map (Fig. 13)
Eagle Basin	Weber Sandstone	3	160	15	Sp	eolian	planar foresets	40.064	-107.372	Johnson, 1987	location interpolated from georeferenced map (Fig. 13)
Eagle Basin	Fryingpan River sandstone	3	199	5	Sp	eolian	planar foresets	39.353	-107.043	Johnson, 1987	location interpolated from georeferenced map (Fig. 13)
	Casper Sandstone	3	236	388	Sp & St	eolian	planar & trough foresets	41.085	-105.601	Opdyke & Runcorn, 1960	location interpolated from georeferenced map
	Casper Sandstone	3	199	424	Sp & St	eolian	planar & trough foresets	41.222	-105.455	Opdyke & Runcorn, 1960	location interpolated from georeferenced map
	Casper Sandstone	3	211	32	Sp & St	eolian	planar & trough foresets	42.413	-106.804	Opdyke & Runcorn, 1960	location interpolated from georeferenced map
	Casper Sandstone	3	192	29	Sp & St	eolian	planar & trough foresets	42.745	-106.31	Opdyke & Runcorn, 1960	location interpolated from georeferenced map
	Casper Sandstone	3	225	26	Sp & St	eolian	planar & trough foresets	41.385	-105.266	Opdyke & Runcorn, 1960	location interpolated from georeferenced map
	Tensleep Sandstone	3	186	30	Sp & St	eolian	planar & trough foresets	42.052	-106.023	Opdyke & Runcorn, 1960	location interpolated from georeferenced map
	Tensleep Sandstone	3	153	29	Sp & St	eolian	planar & trough foresets	42.102	-106.509	Opdyke & Runcorn, 1960	location interpolated from georeferenced map
	Tensleep Sandstone	3	207	31	Sp & St	eolian	planar & trough foresets	44.01	-107.348	Opdyke & Runcorn, 1960	location interpolated from georeferenced map
	Tensleep Sandstone	3	226	31	Sp & St	eolian	planar & trough foresets	44.283	-107.523	Opdyke & Runcorn, 1960	location interpolated from georeferenced map
	Tensleep Sandstone	3	211	30	Sp & St	eolian	planar & trough foresets	43.546	-108.095	Opdyke & Runcorn, 1960	location interpolated from georeferenced map
	Tensleep Sandstone	3	195	31	Sp & St	eolian	planar & trough foresets	43.346	-109.334	Opdyke & Runcorn, 1960	location interpolated from georeferenced map
	Tensleep Sandstone	3	196	31	Sp & St	eolian	planar & trough foresets	42.832	-108.811	Opdyke & Runcorn, 1960	location interpolated from georeferenced map
	Tensleep Sandstone	3	195	26	Sp & St	eolian	planar & trough foresets	42.687	-108.626	Opdyke & Runcorn, 1960	location interpolated from georeferenced map
Eagle Basin	Weber Sandstone	3	249	30	Sp & St	eolian	planar & trough foresets	40.954	-109.876	Opdyke & Runcorn, 1960	location interpolated from georeferenced map
Eagle Basin	Weber Sandstone	3	202	37	Sp & St	eolian	planar & trough foresets	40.623	-109.676	Opdyke & Runcorn, 1960	location interpolated from georeferenced map
Eagle Basin	Weber Sandstone	3	226	32	Sp & St	eolian	planar & trough foresets	40.673	-109.329	Opdyke & Runcorn, 1960	location interpolated from georeferenced map
Eagle Basin	Weber Sandstone	3	204	32	Sp & St	eolian	planar & trough foresets	40.564	-109.175	Opdyke & Runcorn, 1960	location interpolated from georeferenced map
Eagle Basin	Weber Sandstone	3	203	30	Sp & St	eolian	planar & trough foresets	40.585	-108.811	Opdyke & Runcorn, 1960	location interpolated from georeferenced map
Paradox Basin	White Rim	4	174	10	Sf/Sp	eolian	planar foresets	37.898	-110.489	Lawton et al., 2015 and references therein	locationand azimuth interpolated from georeferenced map (Fig. 4)
Paradox Basin	White Rim	4	159	10	Sf/Sp	eolian	planar foresets	38.104	-110.426	Lawton et al., 2015 and references therein	locationand azimuth interpolated from georeferenced map (Fig. 4)
Paradox Basin	White Rim	4	160	10	Sf/Sp	eolian	planar foresets	38.054	-110.392	Lawton et al., 2015 and references therein	locationand azimuth interpolated from georeferenced map (Fig. 4)
Paradox Basin	White Rim	4	102	10	Sf/Sp	eolian	planar foresets	38.178	-110.149	Lawton et al., 2015 and references therein	locationand azimuth interpolated from georeferenced map (Fig. 4)
Paradox Basin	White Rim	4	183	10	Sf/Sp	eolian	planar foresets	38.105	110.106	Lawton et al., 2015 and references therein	locationand azimuth interpolated from georeferenced map (Fig. 4)
Paradox Basin	White Rim	4	142	10	Sf/Sp	eolian	planar foresets	38.129	-110.091	Lawton et al., 2015 and references therein	locationand azimuth interpolated from georeferenced map (Fig. 4)
Paradox Basin	White Rim	4	143	10	Sf/Sp	eolian	planar foresets	38.171	-110.085	Lawton et al., 2015 and references therein	locationand azimuth interpolated from georeferenced map (Fig. 4)
Paradox Basin	White Rim	4	110	10	Sf/Sp	eolian	planar foresets	38.225	-110.162	Lawton et al., 2015 and references therein	locationand azimuth interpolated from georeferenced map (Fig. 4)
Paradox Basin	White Rim	4	143	10	Sf/Sp	eolian	planar foresets	38.258	-110.105	Lawton et al., 2015 and references therein	locationand azimuth interpolated from georeferenced map (Fig. 4)
Paradox Basin	White Rim	4	115	10	Sf/Sp	eolian	planar foresets	38.239	-110.042	Lawton et al., 2015 and references therein	locationand azimuth interpolated from georeferenced map (Fig. 4)
Paradox Basin	White Rim	4	151	10	Sf/Sp	eolian	planar foresets	38.294	-110.092	Lawton et al., 2015 and references therein	locationand azimuth interpolated from georeferenced map (Fig. 4)
Paradox Basin	White Rim	4	134	10	Sf/Sp	eolian	planar foresets	38.394	-110.092	Lawton et al., 2015 and references therein	locationand azimuth interpolated from georeferenced map (Fig. 4)
Paradox Basin	White Rim	4	106	10	Sf/Sp	eolian	planar foresets	38.396	-109.824	Lawton et al., 2015 and references therein	locationand azimuth interpolated from georeferenced map (Fig. 4)
Paradox Basin	White Rim	4	126	10	Sf/Sp	eolian	planar foresets	38.429	-109.799	Lawton et al., 2015 and references therein	locationand azimuth interpolated from georeferenced map (Fig. 4)
Paradox Basin	Castle Valley	4	123	10	Sf/Sp	eolian	planar foresets	38.639	-109.471	Lawton et al., 2015 and references therein	locationand azimuth interpolated from georeferenced map (Fig. 4)
Paradox Basin	Castle Valley	4	231	10	Sf/Sp	eolian	planar foresets	38.618	-109.397	Lawton et al., 2015 and references therein	locationand azimuth interpolated from georeferenced map (Fig. 4)
Arizona Shelf	Coconino Sandstone	4	201	not included	not included	eolian	not included	36.668	-113.719	Adams, 1980	location and azimuth interpolated from georeferenced map
Arizona Shelf	Coconino Sandstone	4	179	not included	not included	eolian	not included	36.02	-113.305	Adams, 1980	location and azimuth interpolated from georeferenced map
Arizona Shelf	Coconino Sandstone	4	177	not included	not included	eolian	not included	35.475	-112.976	Adams, 1980	location and azimuth interpolated from georeferenced map
Arizona Shelf	Coconino Sandstone	4	186	not included	not included	eolian	not included	36.705	-112.425	Adams, 1980	location and azimuth interpolated from georeferenced map
Arizona Shelf	Coconino Sandstone	4	187	not included	not included	eolian	not included	36.108	-111.939	Adams, 1980	location and azimuth interpolated from georeferenced map
Arizona Shelf	Coconino Sandstone	4	241	not included	not included	eolian	not included	36.726	-111.722	Adams, 1980	location and azimuth interpolated from georeferenced map
Arizona Shelf	Coconino Sandstone	4	183	not included	not included	eolian	not included	35.049	-111.875	Adams, 1980	location and azimuth interpolated from georeferenced map
Arizona Shelf	Coconino Sandstone	4	208	not included	not included	eolian	not included	34.914	-110.949	Adams, 1980	location and azimuth interpolated from georeferenced map
Arizona Shelf	Coconino Sandstone	4	167	not included	not included	eolian	not included	34.938	-110.747	Adams, 1980	location and azimuth interpolated from georeferenced map
Arizona Shelf	Coconino Sandstone	4	115	not included	not included	eolian	not included	34.804	-110.438	Adams, 1980	location and azimuth interpolated from georeferenced map
Arizona Shelf	Coconino Sandstone	4	124	not included	not included	eolian	not included	34.811	-110.083	Adams, 1980	location and azimuth interpolated from georeferenced map
Arizona Shelf	Coconino Sandstone	4	102	not included	not included	eolian	not included	34.625	-110.118	Adams, 1980	location and azimuth interpolated from georeferenced map
Arizona Shelf	Coconino Sandstone	4	149	not included	not included	eolian	not included	34.48	-111.627	Adams, 1980	location and azimuth interpolated from georeferenced map
Arizona Shelf	De Chelly Sandstone	4	219	not included	not included	eolian	not included	36.176	-109.508	Adams, 1980	location and azimuth interpolated from georeferenced map
Arizona Shelf	De Chelly Sandstone	4	213	not included	not included	eolian	not included	35.891	-109.487	Adams, 1980	location and azimuth interpolated from georeferenced map
Arizona Shelf	De Chelly Sandstone	4	224	not included	not included	eolian	not included	35.783	-109.182	Adams, 1980	location and azimuth interpolated from georeferenced map
Arizona Shelf	De Chelly Sandstone	4	158	not included	not included	eolian	not included	35.481	-109.341	Adams, 1980	location and azimuth interpolated from georeferenced map
Arizona Shelf	De Chelly Sandstone	4	232	not included	not included	eolian	not included	35.449	-109.18	Adams, 1980	location and azimuth interpolated from georeferenced map
Eagle Basin	State Bridge Fm.?	5	138	20	St	deltaic	trough limbs	39.6645	-107.698	this study
Norian trough-CO Plateau	Chinle-Dockum system	5	310	not included	not included	fluvial-alluvial	not included	32.657	-101.13	Dickinson & Gehrels, 2008 and references therein	location and azimuth interpolated from georeferenced map (Fig. 5)
Norian trough-CO Plateau	Chinle-Dockum system	5	306	not included	not included	fluvial-alluvial	not included	34.142	-101.721	Dickinson & Gehrels, 2008 and references therein	location and azimuth interpolated from georeferenced map (Fig. 5)
Norian trough-CO Plateau	Chinle-Dockum system	5	322	not included	not included	fluvial-alluvial	not included	34.763	-101.906	Dickinson & Gehrels, 2008 and references therein	location and azimuth interpolated from georeferenced map (Fig. 5)
Norian trough-CO Plateau	Chinle-Dockum system	5	311	not included	not included	fluvial-alluvial	not included	35.076	-101.443	Dickinson & Gehrels, 2008 and references therein	location and azimuth interpolated from georeferenced map (Fig. 5)
Norian trough-CO Plateau	Chinle-Dockum system	5	304	not included	not included	fluvial-alluvial	not included	34.953	-103.421	Dickinson & Gehrels, 2008 and references therein	location and azimuth interpolated from georeferenced map (Fig. 5)
Norian trough-CO Plateau	Chinle-Dockum system	5	284	not included	not included	fluvial-alluvial	not included	35.21	-103.992	Dickinson & Gehrels, 2008 and references therein	location and azimuth interpolated from georeferenced map (Fig. 5)
Norian trough-CO Plateau	Chinle-Dockum system	5	292	not included	not included	fluvial-alluvial	not included	35.267	-104.649	Dickinson & Gehrels, 2008 and references therein	location and azimuth interpolated from georeferenced map (Fig. 5)
Norian trough-CO Plateau	Chinle-Dockum system	5	235	not included	not included	fluvial-alluvial	not included	35.621	-104.767	Dickinson & Gehrels, 2008 and references therein	location and azimuth interpolated from georeferenced map (Fig. 5)
Norian trough-CO Plateau	Chinle-Dockum system	5	302	not included	not included	fluvial-alluvial	not included	35.724	-105.055	Dickinson & Gehrels, 2008 and references therein	location and azimuth interpolated from georeferenced map (Fig. 5)
Norian trough-CO Plateau	Chinle-Dockum system	5	334	not included	not included	fluvial-alluvial	not included	35.945	-104.983	Dickinson & Gehrels, 2008 and references therein	location and azimuth interpolated from georeferenced map (Fig. 5)
Norian trough-CO Plateau	Chinle-Dockum system	5	40	not included	not included	fluvial-alluvial	not included	34.722	-107.398	Dickinson & Gehrels, 2008 and references therein	location and azimuth interpolated from georeferenced map (Fig. 5)
Norian trough-CO Plateau	Chinle-Dockum system	5	88	not included	not included	fluvial-alluvial	not included	34.768	-108.61	Dickinson & Gehrels, 2008 and references therein	location and azimuth interpolated from georeferenced map (Fig. 5)
Norian trough-CO Plateau	Chinle-Dockum system	5	37	not included	not included	fluvial-alluvial	not included	35.056	-108.805	Dickinson & Gehrels, 2008 and references therein	location and azimuth interpolated from georeferenced map (Fig. 5)
Norian trough-CO Plateau	Chinle-Dockum system	5	69	not included	not included	fluvial-alluvial	not included	34.953	-109.499	Dickinson & Gehrels, 2008 and references therein	location and azimuth interpolated from georeferenced map (Fig. 5)
Norian trough-CO Plateau	Chinle-Dockum system	5	359	not included	not included	fluvial-alluvial	not included	35.179	-109.822	Dickinson & Gehrels, 2008 and references therein	location and azimuth interpolated from georeferenced map (Fig. 5)
Norian trough-CO Plateau	Chinle-Dockum system	5	7	not included	not included	fluvial-alluvial	not included	35.909	-109.406	Dickinson & Gehrels, 2008 and references therein	location and azimuth interpolated from georeferenced map (Fig. 5)
Norian trough-CO Plateau	Chinle-Dockum system	5	31	not included	not included	fluvial-alluvial	not included	35.986	-108.851	Dickinson & Gehrels, 2008 and references therein	location and azimuth interpolated from georeferenced map (Fig. 5)
Norian trough-CO Plateau	Chinle-Dockum system	5	350	not included	not included	fluvial-alluvial	not included	35.57	-108.507	Dickinson & Gehrels, 2008 and references therein	location and azimuth interpolated from georeferenced map (Fig. 5)
Norian trough-CO Plateau	Chinle-Dockum system	5	36	not included	not included	fluvial-alluvial	not included	35.446	-107.906	Dickinson & Gehrels, 2008 and references therein	location and azimuth interpolated from georeferenced map (Fig. 5)
Norian trough-CO Plateau	Chinle-Dockum system	5	6	not included	not included	fluvial-alluvial	not included	36.7	-109.206	Dickinson & Gehrels, 2008 and references therein	location and azimuth interpolated from georeferenced map (Fig. 5)
Norian trough-CO Plateau	Chinle-Dockum system	5	321	not included	not included	fluvial-alluvial	not included	36.767	-110.68	Dickinson & Gehrels, 2008 and references therein	location and azimuth interpolated from georeferenced map (Fig. 5)
Norian trough-CO Plateau	Chinle-Dockum system	5	294	not included	not included	fluvial-alluvial	not included	37.137	-110.043	Dickinson & Gehrels, 2008 and references therein	location and azimuth interpolated from georeferenced map (Fig. 5)
Norian trough-CO Plateau	Chinle-Dockum system	5	267	not included	not included	fluvial-alluvial	not included	37.234	-107.762	Dickinson & Gehrels, 2008 and references therein	location and azimuth interpolated from georeferenced map (Fig. 5)
Norian trough-CO Plateau	Chinle-Dockum system	5	356	not included	not included	fluvial-alluvial	not included	37.183	-107.526	Dickinson & Gehrels, 2008 and references therein	location and azimuth interpolated from georeferenced map (Fig. 5)
Norian trough-CO Plateau	Chinle-Dockum system	5	272	not included	not included	fluvial-alluvial	not included	37.614	-108.374	Dickinson & Gehrels, 2008 and references therein	location and azimuth interpolated from georeferenced map (Fig. 5)
Norian trough-CO Plateau	Chinle-Dockum system	5	303	not included	not included	fluvial-alluvial	not included	37.866	-108.677	Dickinson & Gehrels, 2008 and references therein	location and azimuth interpolated from georeferenced map (Fig. 5)
Norian trough-CO Plateau	Chinle-Dockum system	5	254	not included	not included	fluvial-alluvial	not included	37.717	-109.55	Dickinson & Gehrels, 2008 and references therein	location and azimuth interpolated from georeferenced map (Fig. 5)
Norian trough-CO Plateau	Chinle-Dockum system	5	318	not included	not included	fluvial-alluvial	not included	38.601	-107.93	Dickinson & Gehrels, 2008 and references therein	location and azimuth interpolated from georeferenced map (Fig. 5)
Norian trough-CO Plateau	Chinle-Dockum system	5	4	not included	not included	fluvial-alluvial	not included	38.976	-110.346	Dickinson & Gehrels, 2008 and references therein	location and azimuth interpolated from georeferenced map (Fig. 5)
Carnian trough-CO Plateau	Chinle-Dockum system	5	348	not included	not included	fluvial-alluvial	not included	39.65	-106.793	Dickinson & Gehrels, 2008 and references therein	location and azimuth interpolated from georeferenced map (Fig. 5)
Carnian trough-CO Plateau	Chinle-Dockum system	5	328	not included	not included	fluvial-alluvial	not included	39.831	-107.736	Dickinson & Gehrels, 2008 and references therein	location and azimuth interpolated from georeferenced map (Fig. 5)
Carnian trough-CO Plateau	Chinle-Dockum system	5	291	not included	not included	fluvial-alluvial	not included	40.335	-108.649	Dickinson & Gehrels, 2008 and references therein	location and azimuth interpolated from georeferenced map (Fig. 5)
Carnian trough-CO Plateau	Chinle-Dockum system	5	290	not included	not included	fluvial-alluvial	not included	40.136	-109.277	Dickinson & Gehrels, 2008 and references therein	location and azimuth interpolated from georeferenced map (Fig. 5)
Carnian trough-CO Plateau	Chinle-Dockum system	5	308	not included	not included	fluvial-alluvial	not included	40.307	-110.105	Dickinson & Gehrels, 2008 and references therein	location and azimuth interpolated from georeferenced map (Fig. 5)
Carnian trough-CO Plateau	Chinle-Dockum system	5	311	not included	not included	fluvial-alluvial	not included	40.44	-109.82	Dickinson & Gehrels, 2008 and references therein	location and azimuth interpolated from georeferenced map (Fig. 4)
Carnian trough-CO Plateau	Chinle-Dockum system	5	266	not included	not included	fluvial-alluvial	not included	40.487	-110.658	Dickinson & Gehrels, 2008 and references therein	location and azimuth interpolated from georeferenced map (Fig. 4)
Carnian trough-CO Plateau	Chinle-Dockum system	5	314	not included	not included	fluvial-alluvial	not included	32.959	-101.682	Dickinson & Gehrels, 2008 and references therein	location and azimuth interpolated from georeferenced map (Fig. 4)
Carnian trough-CO Plateau	Chinle-Dockum system	5	224	not included	not included	fluvial-alluvial	not included	35.043	-101.577	Dickinson & Gehrels, 2008 and references therein	location and azimuth interpolated from georeferenced map (Fig. 4)
Carnian trough-CO Plateau	Chinle-Dockum system	5	264	not included	not included	fluvial-alluvial	not included	35.024	-104.223	Dickinson & Gehrels, 2008 and references therein	location and azimuth interpolated from georeferenced map (Fig. 4)
Carnian trough-CO Plateau	Chinle-Dockum system	5	35	not included	not included	fluvial-alluvial	not included	34.767	-109.649	Dickinson & Gehrels, 2008 and references therein	location and azimuth interpolated from georeferenced map (Fig. 4)
Carnian trough-CO Plateau	Chinle-Dockum system	5	294	not included	not included	fluvial-alluvial	not included	35.519	-109.287	Dickinson & Gehrels, 2008 and references therein	location and azimuth interpolated from georeferenced map (Fig. 4)
Carnian trough-CO Plateau	Chinle-Dockum system	5	36	not included	not included	fluvial-alluvial	not included	36.195	-111.162	Dickinson & Gehrels, 2008 and references therein	location and azimuth interpolated from georeferenced map (Fig. 4)
Carnian trough-CO Plateau	Chinle-Dockum system	5	305	not included	not included	fluvial-alluvial	not included	37.023	-112.923	Dickinson & Gehrels, 2008 and references therein	location and azimuth interpolated from georeferenced map (Fig. 4)
Carnian trough-CO Plateau	Chinle-Dockum system	5	316	not included	not included	fluvial-alluvial	not included	37.128	-113.494	Dickinson & Gehrels, 2008 and references therein	location and azimuth interpolated from georeferenced map (Fig. 4)
Arizona Shelf	Chinle-Dockum system	5	92	not included	not included	fluvial-alluvial	not included	35.547	-115.473	Riggs et al., 2016 and references therein	location and azimuth interpolated from georeferenced map
Arizona Shelf	Chinle-Dockum system	5	344	not included	not included	fluvial-alluvial	not included	36.052	-114.795	Riggs et al., 2016 and references therein	location and azimuth interpolated from georeferenced map
Arizona Shelf	Chinle-Dockum system	5	305	not included	not included	fluvial-alluvial	not included	36.48	-113.574	Riggs et al., 2016 and references therein	location and azimuth interpolated from georeferenced map
Arizona Shelf	Chinle-Dockum system	5	283	not included	not included	fluvial-alluvial	not included	37.294	-112.86	Riggs et al., 2016 and references therein	location and azimuth interpolated from georeferenced map
Arizona Shelf	Chinle-Dockum system	5	304	not included	not included	fluvial-alluvial	not included	37.091	-111.98	Riggs et al., 2016 and references therein	location and azimuth interpolated from georeferenced map
Arizona Shelf	Chinle-Dockum system	5	297	not included	not included	fluvial-alluvial	not included	37.924	-110.659	Riggs et al., 2016 and references therein	location and azimuth interpolated from georeferenced map
Arizona Shelf	Chinle-Dockum system	5	346	not included	not included	fluvial-alluvial	not included	35.21	-111.064	Riggs et al., 2016 and references therein	location and azimuth interpolated from georeferenced map
Arizona Shelf	Chinle-Dockum system	5	305	not included	not included	fluvial-alluvial	not included	35.271	-110.148	Riggs et al., 2016 and references therein	location and azimuth interpolated from georeferenced map
Arizona Shelf	Chinle-Dockum system	5	317	not included	not included	fluvial-alluvial	not included	35.937	-109.386	Riggs et al., 2016 and references therein	location and azimuth interpolated from georeferenced map
Marathon Basin	Haymond Fm.	3	238	not included	not included	deltaic-marine	not included	30.4827	-102.852	Gleason et al., 2007	azimuth from fig. 3, lat./long. from Z4 sample
Marathon Basin	Haymond Fm.	3	272	not included	not included	deltaic-marine	not included	30.4827	-102.852	Gleason et al., 2007	azimuth from fig. 3, lat./long. from Z4 sample
Marathon Basin	Haymond Fm.	3	302	not included	not included	deltaic-marine	not included	30.4827	-102.852	Gleason et al., 2007	azimuth from fig. 3, lat./long. from Z4 sample
Marathon Basin	Tensus Fm.	2	278	not included	not included	deltaic-turbiditic	not included	30.2102	-103.187	Gleason et al., 2007	azimuth from fig. 3, lat./long. from Z1 sample
Marathon Basin	Tensus Fm.	2	297	not included	not included	deltaic-turbiditic	not included	30.2102	-103.187	Gleason et al., 2007	lat./long. from Z1sample
Marathon Basin	Tensus Fm.	2	316	not included	not included	deltaic-turbiditic	not included	30.2102	-103.187	Gleason et al., 2007	lat./long. from Z1sample
Marathon Basin	Tensus Fm.	2	340	not included	not included	deltaic-turbiditic	not included	30.2102	-103.187	Gleason et al., 2007	lat./long. from Z1sample
Marathon Basin	Tensus Fm.	2	9	not included	not included	deltaic-turbiditic	not included	30.2102	-103.187	Gleason et al., 2007	lat./long. from Z1sample
Wood River Basin	Desmoinesian	3	257	14	not included	deltaic-turbiditic	not included	42.8	-112.747	Gelsin, 1988	location interpolated from georeferenced map
Wood River Basin	Desmoinesian	3	229	48	not included	deltaic-turbiditic	not included	42.472	-113.028	Gelsin, 1988	location interpolated from georeferenced map
Wood River Basin	Missourian-Virgilian	3	189	17	not included	deltaic-turbiditic	not included	44.741	-114.741	Gelsin, 1988	location interpolated from georeferenced map
Wood River Basin	Missourian-Virgilian	3	257	14	not included	deltaic-turbiditic	not included	42.672	-112.761	Gelsin, 1988	location interpolated from georeferenced map
Wood River Basin	early Wolfcampian	3	189	17	not included	deltaic-turbiditic	not included	44.257	-114.722	Gelsin, 1988	location interpolated from georeferenced map
Wood River Basin	early Wolfcampian	3	116	19	not included	deltaic-turbiditic	not included	43.557	-114.407	Gelsin, 1988	location interpolated from georeferenced map
Wood River Basin	early Wolfcampian	3	72	11	not included	deltaic-turbiditic	not included	41.744	-115.659	Gelsin, 1988	location interpolated from georeferenced map
Wood River Basin	late Wolfcampian-early Leonardian	3	152	76	not included	deltaic-turbiditic	not included	43.895	-114.203	Gelsin, 1988	location interpolated from georeferenced map
Wood River Basin	late Wolfcampian-early Leonardian	3	126	11	not included	deltaic-turbiditic	not included	42.424	-114.089	Gelsin, 1988	location interpolated from georeferenced map
Paradox Basin	White Rim Fm.	4	206	not included	not included	eolian	not included	38.798	-110.625	Dickinson et al., 2018	location and azimuth interpolated from georeferenced map (Fig. 29)
northern Orogrange/southern Paradox	Glorieta Fm.	4	228	not included	not included	eolian	not included	35.396	-106.913	Dickinson et al., 2018	location and azimuth interpolated from georeferenced map (Fig. 29)
northern Orogrange/southern Paradox	Glorieta Fm.	4	204	not included	not included	eolian	not included	35.051	-107.456	Dickinson et al., 2018	location and azimuth interpolated from georeferenced map (Fig. 29)
northern Orogrange/southern Paradox	Glorieta Fm.	4	202	not included	not included	eolian	not included	34.754	-107.242	Dickinson et al., 2018	location and azimuth interpolated from georeferenced map (Fig. 29)
Paradox Basin	DeChelly?	4	209	not included	not included	eolian	not included	37.679	-111.286	Loope et al., 2004	location and azimuth interpolated from georeferenced map (Fig. 2)
Paradox Basin	DeChelly?	4	170	not included	not included	eolian	not included	37.614	-111.139	Loope et al., 2004	location and azimuth interpolated from georeferenced map (Fig. 2)
Paradox Basin	DeChelly?	4	190	not included	not included	eolian	not included	36.675	-110.34	Loope et al., 2004	location and azimuth interpolated from georeferenced map (Fig. 2)
Arizona Shelf	Coconino?	4	231	not included	not included	eolian	not included	35.842	-112.407	Loope et al., 2004	location and azimuth interpolated from georeferenced map (Fig. 2)
Arizona Shelf	Coconino?	4	192	not included	not included	eolian	not included	35.1	-113.279	Loope et al., 2004	location and azimuth interpolated from georeferenced map (Fig. 2)
Arizona Shelf	Coconino?	4	211	not included	not included	eolian	not included	35.48	-113.532	Loope et al., 2004	location and azimuth interpolated from georeferenced map (Fig. 2)
Arizona Shelf	Schnebly Hill?	4	130	not included	not included	eolian	not included	34.149	-111.861	Loope et al., 2004	location and azimuth interpolated from georeferenced map (Fig. 2)
Arizona Shelf	Schnebly Hill?	4	176	not included	not included	eolian	not included	34.149	-111.861	Loope et al., 2004	location and azimuth interpolated from georeferenced map (Fig. 2)
Arizona Shelf	Surprise Canyon	2	west	n/a	n/a	fluvial/estuarine	palleovalley orientation	36.596	-111.768	Billingly & Beus, 1999	location from Gehrels et al. (2011). Orientation is approximation from a mapped palleovalley network exposed throughout the Grand Canyon
Hugoton Embayment	Chester Gp.	2	south	n/a	n/a	fluvial/estuarine	palleovalley orientation	37.5	-101.026	Wang and Bidgoli, 2019	location from Wang and Bidgoli (2019). Orientation is approximation from a palleovalleys mapped in the subsurface.
Hugoton Embayment	Morrow Fm.	2	south	n/a	n/a	fluvial/estuarine	palleovalley orientation	38.421	-102.027	Bowen & Weimer, 2003	location from Bowen & Weimer (2003). Orientation is approximation from a palleovalleys mapped in the subsurface.
Hugoton Embayment	Morrow Fm.	2	southeast	n/a	n/a	fluvial/estuarine	palleovalley orientation	38.709	-102.445	Bowen & Weimer, 2003	location from Bowen & Weimer (2003). Orientation is approximation from a palleovalleys mapped in the subsurface.
Hugoton Embayment	Morrow Fm.	2	southeast	n/a	n/a	fluvial/estuarine	palleovalley orientation	39.008	-102.433	Bowen & Weimer, 2003	location from Bowen & Weimer (2003). Orientation is approximation from a palleovalleys mapped in the subsurface.
Marathon Basin	Road Canyon Fm.	4	313	12		marine		30.5	-103	Lehrmann, 1957; Brand et al., 2016
Deleware Basin	Cherry Canyon	4	120	616		marine		31.4	-103.5	Willis, 1967; Brand et al., 2016
Deleware Basin		4	200	42				31.6	-104.2	Harms & Williams, 1988; Brand et al., 2016
Deleware Basin		4	315	43				32	-104.48	Martinez, 1958; Brand et al., 2016
Deleware Basin		4	160	66				31.75	-104.6	Harms & Williams, 1988; Brand et al., 2016
Deleware Basin		4	210	8				31.8	-104.73	Harms & Williams, 1988; Brand et al., 2016
Orogrande Basin	Red House Fm.	3	359	5				32.95	-106.85	Kalesky, 1988; Brand et al., 2016
Orogrande Basin	Red House Fm.	3	309	12				32.95	-106.9	Kalesky, 1988; Brand et al., 2016
Pedegrosa Fm.	Earp Fm.	3	248	6				31.96	-109.96	Rea, 1967; Brand et al., 2016
Arizona Shelf		3	135	5				36.9	-112.3	McKee, E. D., 1940; Brand et al., 2016
Arizona Shelf	Supai	3	170	5				36.8	-113.6	McKee, E. D., 1940; Brand et al., 2016
Arizona Shelf		3	225	5				36.5	-113	McKee, E. D., 1940; Brand et al., 2016
Arizona Shelf		3	270	5				35.8	-113.6	McKee, E. D., 1940; Brand et al., 2016
Arizona Shelf		3	250	5				35.5	-113.5	McKee, E. D., 1940; Brand et al., 2016
Arizona Shelf		3	135	5				36.5	-112.5	McKee, E. D., 1940; Brand et al., 2016
Arizona Shelf		3	135	5				36.3	-112.4	McKee, E. D., 1940; Brand et al., 2016
Arizona Shelf		3	130	5				36.1	-111.7	McKee, E. D., 1940; Brand et al., 2016
Arizona Shelf		3	260	5				36	-111.7	McKee, E. D., 1940; Brand et al., 2016
Arizona Shelf		3	160	20				34.9	-111.75	Conyers, 1975; Brand et al., 2016
Arizona Shelf		3	135	20				34.8	-111.65	Conyers, 1975; Brand et al., 2016
Arizona Shelf		3	190	20				35.1	-111.9	McKee, E. D., 1940; Brand et al., 2016
Arizona Shelf		3	135	20				34.6	-111.7	Conyers, 1975; Brand et al., 2016
Arizona Shelf		3	180	20				35.1	-111.75	Conyers, 1975; Brand et al., 2016
	Diamond Creek Sandstone	4	150	8				41.05	-113.35	record #1972; Brand et al., 2016
	Diamond Creek Sandstone	4	210	34				41.6	-113.35	record #1972; Brand et al., 2016
	Diamond Creek Sandstone	4	225	12				41.5	112.7	record #1972; Brand et al., 2016
	Diamond Creek Sandstone	4	225	37				40.8	-112	record #1972; Brand et al., 2016
				268
*fields left blank where data was unavailable
